# Supplementary material for: 8-Prenylgenistein, a prenylated genistein derivative, exerted tissue selective osteoprotective effects in ovariectomized mice
Source: PubMed Central journal article supplement (PMC5966244; doi:10.18632/oncotarget.24823), 2018-03-19
Supplement: oncotarget-09-24221-s001.pdf [file oncotarget-09-24221-s001.pdf]

## 8-Prenylgenistein, a prenylated genistein derivative, exerted tissue selective osteoprotective effects in ovariectomized mice

### SUPPLEMENTARY MATERIALS

**Supplementary Table 1: Formulations and estimated nutrient composition of experimental diets**

| Product <sup>1</sup> | D00031602 |       | D13052402 |       | D13052403 |       | D13052408 |       |
|----------------------|-----------|-------|-----------|-------|-----------|-------|-----------|-------|
|                      | gm%       | kcal% | gm%       | kcal% | gm%       | kcal% | gm%       | kcal% |
| Protein              | 14.2      | 14.7  | 14.2      | 14.7  | 14.2      | 14.7  | 14.2      | 14.7  |
| Carbohydrate         | 73.1      | 75.9  | 73.0      | 75.9  | 73.0      | 75.9  | 73.0      | 75.9  |
| Fat                  | 4.0       | 9.4   | 4.0       | 9.4   | 4.0       | 9.4   | 4.0       | 9.4   |
| Total                |           | 100.0 |           | 100.0 |           | 100.0 |           | 100.0 |
| kcal/gm              | 3.85      |       | 3.85      |       | 3.85      |       | 3.85      |       |

  

| Ingredient           | gm            | kcal        | gm             | kcal        | gm             | kcal        | gm             | kcal        |
|----------------------|---------------|-------------|----------------|-------------|----------------|-------------|----------------|-------------|
| Casein               | 140           | 560         | 140            | 560         | 140            | 560         | 140            | 560         |
| L-Cystine            | 1.8           | 7.2         | 1.8            | 7.2         | 1.8            | 7.2         | 1.8            | 7.2         |
| Corn Starch          | 495.692       | 1982.8      | 495.692        | 1982.8      | 495.692        | 1982.8      | 495.692        | 1982.8      |
| Maltodextrin 10      | 125           | 500         | 125            | 500         | 125            | 500         | 125            | 500         |
| Sucrose              | 100           | 400         | 100            | 400         | 100            | 400         | 100            | 400         |
| Cellulose, BW200     | 50            | 0           | 50             | 0           | 50             | 0           | 50             | 0           |
| Corn Oil             | 40            | 360         | 40             | 360         | 40             | 360         | 40             | 360         |
| t-Butylhydroquinone  | 0.008         | 0           | 0.008          | 0           | 0.008          | 0           | 0.008          | 0           |
| Mineral Mix S10022M2 | 35            | 0           | 35             | 0           | 35             | 0           | 35             | 0           |
| Vitamin Mix V100373  | 10            | 40          | 10             | 40          | 10             | 40          | 10             | 40          |
| Choline Bitartrate   | 2.5           | 0           | 2.5            | 0           | 2.5            | 0           | 2.5            | 0           |
| 8-prenylgenistein    | 0             | 0           | 0.31           | 0           | 0.62           | 0           | 0              | 0           |
| Genistein            | 0             | 0           | 0              | 0           | 0              | 0           | 0.6            | 0           |
| Red Dye, FD&C #40    | 0.1           | 0           | 0.025          | 0           | 0              | 0           | 0              | 0           |
| Blue Dye, FD&C #1    | 0             | 0           | 0              | 0           | 0.05           | 0           | 0.01           | 0           |
| Yellow Dye, FD&C #5  | 0             | 0           | 0.025          | 0           | 0              | 0           | 0.04           | 0           |
| <b>Total</b>         | <b>1000.1</b> | <b>3850</b> | <b>1000.36</b> | <b>3850</b> | <b>1000.67</b> | <b>3850</b> | <b>1000.65</b> | <b>3850</b> |

<sup>1</sup>Prepared by Research diets, Inc., New Brunswick, NJ.

<sup>2</sup>The mineral mix composition (AIN-93M) was as follows (amount in 35 g): 5.0 g Ca, 2.0 g P, 0.5 g Mg, 3.6 g K, 0.3 g S, 1.0 g Na, 1.6 g Cl, 6.0 mg Cu, 0.2 mg I, 45 mg Fe, 10.5 mg Mn, 0.2 mg Se and 30.0 mg Zn.

<sup>3</sup>The vitamin mixture composition (AIN-93) was as follows (amount in 10 g): 4000 IU vitamin A palmitate, 1000 IU cholecalciferol, 75 IU vitamin E acetate, 0.75 mg phyloquinone, 0.2 mg biotin, 25 µg cyanocobalamin, 2 mg folic acid, 30 mg nicotinic acid, 16 mg calcium pantothenate, 7 mg pyridoxine-HCl, 6 mg riboflavin, 6 mg thiamin HCl.

**Supplementary Table 2: Primer sequences of genes**

| Gene<br>(Abbreviation) | Full name                                              | Primer sequences<br>(5'-3')                                | Product length<br>(bp) |
|------------------------|--------------------------------------------------------|------------------------------------------------------------|------------------------|
| RANKL                  | Receptor activator of nuclear factor<br>kappa-B ligand | F: gaaaggaggagcacgaaaa<br>R: tgaaagcccaagtacgtc            | 167                    |
| OPG                    | Osteoprotegerin                                        | F: ctgatgtatgccctcaagca<br>R: aaacagcccagtgaccattc         | 198                    |
| ER- $\alpha$           | Estrogen receptor-alpha                                | F: tcccgcctctacaggtcta<br>R: ctccggttctgtcaatggt           | 264                    |
| GPOR                   | G protein-coupled estrogen receptor                    | F: cctgggtagaggacattag<br>R: gctcgaagtgggaaatacag          | 112                    |
| RUNX2                  | Runt-related transcription factor 2                    | F: cccagccacctttacctaca<br>R: tatggagtctgctgtgctg          | 150                    |
| ALP                    | Alkaline phosphates                                    | F: gaaagagaagaccccagtt<br>R: ctcatgtccgagtaccagt           | 511                    |
| COL                    | Type I collagen                                        | F: cagactggcaacctcaagaa<br>R: ggccaatgtctagtccgaat         | 241                    |
| OCN                    | Osteocalcin                                            | F: gacacatgaggaccatcttt<br>R: tagagaccactccagcaca          | 225                    |
| SOST                   | sclerostin                                             | F: cttcaggaatgatgccacagaggt<br>R: atctttggcgtcatagggatggtg | 136                    |
| CtsK                   | Cathepsin K                                            | F: gagacatgaccagcgaagaa<br>R: cacatattggaaggcagtg          | 332                    |
| PR                     | Progesterone receptor                                  | F: ggtgggccttctaacgag<br>R: gaccacatcaggctcaatgct          | 121                    |
| C3                     | Complement component 3                                 | F: ggagccagtggacatctgaga<br>R: ccctcttatctgagttgaattcct    | 74                     |
| GAPDH                  | Glyceraldehyde-3-phosphate<br>dehydrogenase            | F: cagaacatcatccctgcatc<br>R: ctgcttaccaccttcttga          | 183                    |
| ER- $\alpha^*$         | Estrogen receptor-alpha                                | F: cgtcgcctctaactcgg<br>R: tcccagatgctttggtgtg             | 140                    |
| C3*                    | Complement component 3                                 | F: gccaggagtggactatgtgt<br>R: ggcttctctgcacttgatgg         | 166                    |

\*, for human endometrial Ishikawa cell.
